# Supplementary material
Source: PubMed Central journal article supplement (PMC3242810)
Supplement: epi0611_1276SD1.pdf [file epi0611_1276SD1.pdf]

Supplementary Table 1.

| Nutrients                     | range     | <i>ESRI</i> |     | OR(95% CI)      | <i>PGR</i> |    | OR(95% CI)      | <i>BRCAl</i> |     | OR(95% CI)      |
|-------------------------------|-----------|-------------|-----|-----------------|------------|----|-----------------|--------------|-----|-----------------|
|                               |           | U           | M   |                 | U          | M  |                 | U            | M   |                 |
| <b>Dietary folate</b>         | <195      | 157         | 122 | 1.00(ref.)      | 253        | 29 | 1.00(ref.)      | 115          | 167 | 1.00(ref.)      |
| <b>µg/d</b>                   | 195-294   | 156         | 120 | 0.99(0.71-1.39) | 244        | 34 | 1.22(0.72-2.06) | 115          | 163 | 0.98(0.70-1.37) |
|                               | >294      | 140         | 136 | 1.25(0.90-1.75) | 242        | 37 | 1.33(0.80-2.24) | 111          | 168 | 1.04(0.74-1.46) |
|                               | p,trend   |             |     | 0.17            |            |    | 0.29            |              |     | 0.79            |
| <b>Methionine</b>             | <0.63     | 147         | 135 | 1.00(ref.)      | 251        | 32 | 1.00(ref.)      | 108          | 175 | 1.00(ref.)      |
| <b>g/d</b>                    | 0.63-0.93 | 156         | 112 | 0.78(0.56-1.10) | 240        | 32 | 1.05(0.62-1.76) | 118          | 154 | 0.81(0.57-1.13) |
|                               | >0.93     | 150         | 131 | 0.95(0.68-1.32) | 248        | 36 | 1.14(0.69-1.89) | 115          | 169 | 0.91(0.65-1.27) |
|                               | p,trend   |             |     | 0.88            |            |    | 0.61            |              |     | 0.65            |
| <b>Choline</b>                | <142      | 147         | 135 | 1.00(ref.)      | 256        | 27 | 1.00(ref.)      | 106          | 177 | 1.00(ref.)      |
| <b>mg/d</b>                   | 142-206   | 156         | 112 | 0.78(0.56-1.10) | 239        | 38 | 1.51(0.89-2.55) | 114          | 163 | 0.86(0.61-1.20) |
|                               | >206      | 150         | 131 | 0.95(0.68-1.32) | 244        | 35 | 1.36(0.80-2.31) | 121          | 158 | 0.78(0.56-1.10) |
|                               | p,trend   |             |     | 0.99            |            |    | 0.31            |              |     | 0.16            |
| <b>Betaine</b>                | <77       | 149         | 132 | 1.00(ref.)      | 251        | 30 | 1.00(ref.)      | 106          | 175 | 1.00(ref.)      |
| <b>mg/d</b>                   | 77-138.4  | 159         | 118 | 0.84(0.60-1.17) | 248        | 32 | 1.08(0.64-1.83) | 125          | 155 | 0.75(0.54-1.05) |
|                               | >138.4    | 145         | 128 | 1.00(0.71-1.39) | 240        | 38 | 1.33(0.80-2.21) | 110          | 168 | 0.93(0.66-1.30) |
|                               | p,trend   |             |     | 0.88            |            |    | 0.26            |              |     | 0.85            |
| <b>Vitamin B<sub>2</sub></b>  | <1.14     | 146         | 139 | 1.00(ref.)      | 251        | 37 | 1.00(ref.)      | 112          | 176 | 1.00(ref.)      |
| <b>mg/d</b>                   | 1.14-1.68 | 163         | 108 | 0.70(0.50-0.97) | 240        | 32 | 0.91(0.55-1.50) | 111          | 161 | 0.92(0.66-1.30) |
|                               | >1.68     | 144         | 131 | 0.96(0.69-1.33) | 248        | 31 | 0.85(0.51-1.41) | 118          | 161 | 0.87(0.62-1.21) |
|                               | p,trend   |             |     | 0.96            |            |    | 0.53            |              |     | 0.42            |
| <b>Vitamin B<sub>6</sub></b>  | <1.02     | 162         | 123 | 1.00(ref.)      | 258        | 30 | 1.00(ref.)      | 118          | 170 | 1.00(ref.)      |
| <b>mg/d</b>                   | 1.02-1.49 | 145         | 123 | 1.12(0.80-1.56) | 238        | 34 | 1.23(0.73-2.07) | 107          | 165 | 1.07(0.76-1.50) |
|                               | >1.49     | 146         | 132 | 1.19(0.85-1.66) | 243        | 36 | 1.27(0.76-2.13) | 116          | 163 | 0.98(0.70-1.36) |
|                               | p,trend   |             |     | 0.31            |            |    | 0.38            |              |     | 0.86            |
| <b>Vitamin B<sub>12</sub></b> | <2.84     | 152         | 130 | 1.00(ref.)      | 249        | 36 | 1.00(ref.)      | 117          | 168 | 1.00(ref.)      |
| <b>µg/d</b>                   | 2.84-4.8  | 160         | 120 | 0.88(0.63-1.22) | 247        | 33 | 0.92(0.56-1.53) | 112          | 168 | 1.05(0.75-1.46) |
|                               | >4.8      | 141         | 128 | 1.06(0.76-1.48) | 243        | 31 | 0.88(0.53-1.47) | 112          | 162 | 1.01(0.72-1.41) |
|                               | p,trend   |             |     | 0.66            |            |    | 0.64            |              |     | 0.99            |
| <b>Alcohol</b>                | never     | 191         | 156 | 1.00(ref.)      | 300        | 49 | 1.00(ref.)      | 144          | 205 | 1.00(ref.)      |
| <b>g/d</b>                    | 0-15      | 201         | 170 | 1.04(0.77-1.39) | 332        | 44 | 0.81(0.53-1.26) | 152          | 224 | 1.04(0.77-1.40) |
|                               | >15       | 68          | 57  | 1.03(0.68-1.55) | 117        | 9  | 0.47(0.22-0.99) | 51           | 75  | 1.03(0.68-1.56) |
|                               | p,trend   |             |     | 0.85            |            |    | <b>0.05</b>     |              |     | 0.84            |

Supplementary Table 1. (countinue)

| Nutrients                       | range     | <i>APC</i> |     |                 | <i>p16</i> |    |                 | <i>CDH1</i> |    |                 | <i>RARβ</i> |    |                 | <i>TWIST 1</i> |    |                 |
|---------------------------------|-----------|------------|-----|-----------------|------------|----|-----------------|-------------|----|-----------------|-------------|----|-----------------|----------------|----|-----------------|
|                                 |           | U          | M   | OR(95% CI)      | U          | M  | OR(95% CI)      | U           | M  | OR (95%)        | U           | M  | OR (95% CI)     | U              | M  | OR (95%)        |
| Dietary folate<br>μg/d          | <195      | 124        | 140 | 1.00(ref.)      | 242        | 22 | 1.00(ref.)      | 229         | 19 | 1.00(ref.)      | 182         | 66 | 1.00(ref.)      | 216            | 32 | 1.00(ref.)      |
|                                 | 195-294   | 113        | 148 | 1.16(0.82-1.64) | 234        | 27 | 1.27(0.70-2.29) | 256         | 12 | 0.57(0.27-1.19) | 202         | 66 | 0.90(0.61-1.33) | 219            | 49 | 1.51(0.93-2.45) |
|                                 | >294      | 120        | 143 | 1.06(0.75-1.49) | 233        | 30 | 1.42(0.79-2.53) | 226         | 12 | 0.64(0.30-1.35) | 163         | 75 | 1.27(0.86-1.88) | 204            | 34 | 1.13(0.67-1.89) |
|                                 | p,trend   |            |     | 0.81            |            |    | 0.25            |             |    | 0.20            |             |    | 0.48            |                |    | 0.99            |
| Methionine<br>g/d               | <0.63     | 123        | 141 | 1.00(ref.)      | 238        | 26 | 1.00(ref.)      | 232         | 19 | 1.00(ref.)      | 186         | 65 | 1.00(ref.)      | 222            | 29 | 1.00(ref.)      |
|                                 | 0.63-0.93 | 114        | 146 | 1.12(0.79-1.58) | 234        | 26 | 1.02(0.57-1.80) | 242         | 13 | 0.66(0.32-1.36) | 189         | 66 | 1.00(0.67-1.49) | 209            | 46 | 1.69(1.02-2.78) |
|                                 | >0.93     | 120        | 144 | 1.05(0.74-1.47) | 237        | 27 | 1.04(0.59-1.84) | 237         | 11 | 0.57(0.26-1.22) | 172         | 76 | 1.26(0.86-1.87) | 208            | 40 | 1.47(0.88-2.46) |
|                                 | p,trend   |            |     | 0.84            |            |    | 0.88            |             |    | 0.12            |             |    | 0.29            |                |    | 0.19            |
| Choline<br>mg/d                 | <142      | 126        | 137 | 1.00(ref.)      | 238        | 25 | 1.00(ref.)      | 256         | 16 | 1.00(ref.)      | 203         | 69 | 1.00(ref.)      | 240            | 32 | 1.00(ref.)      |
|                                 | 142-206   | 108        | 155 | 1.32(0.94-1.86) | 236        | 27 | 1.09(0.61-1.93) | 227         | 15 | 1.06(0.51-2.19) | 173         | 69 | 1.17(0.79-1.73) | 200            | 42 | 1.58(0.96-2.59) |
|                                 | >206      | 123        | 139 | 1.04(0.74-1.46) | 235        | 27 | 1.09(0.62-1.94) | 228         | 12 | 0.84(0.39-1.82) | 171         | 69 | 1.19(0.80-1.76) | 199            | 41 | 1.55(0.94-      |
|                                 | p,trend   |            |     | 0.93            |            |    | 0.77            |             |    | 0.50            |             |    | 0.50            |                |    | 0.08            |
| Betaine<br>mg/d                 | <77       | 131        | 132 | 1.00(ref.)      | 243        | 20 | 1.00(ref.)      | 258         | 17 | 1.00(ref.)      | 210         | 65 | 1.00(ref.)      | 243            | 32 | 1.00(ref.)      |
|                                 | 77-138.4  | 125        | 138 | 1.10(0.78-1.54) | 235        | 28 | 1.45(0.79-2.64) | 209         | 15 | 1.09(0.53-2.23) | 158         | 66 | 1.35(0.91-2.01) | 183            | 41 | 1.70(1.03-2.81) |
|                                 | >138.4    | 101        | 161 | 1.58(1.12-2.24) | 231        | 31 | 1.63(0.90-2.94) | 244         | 11 | 0.68(0.31-1.49) | 179         | 76 | 1.37(0.93-2.02) | 213            | 42 | 1.50(0.91-2.46) |
|                                 | p,trend   |            |     | <b>0.007</b>    |            |    | 0.13            |             |    | 0.32            |             |    | 0.18            |                |    | 0.25            |
| Vitamin B <sub>2</sub><br>mg/d  | <1.14     | 127        | 141 | 1.00(ref.)      | 243        | 25 | 1.00(ref.)      | 242         | 21 | 1.00(ref.)      | 189         | 74 | 1.00(ref.)      | 232            | 31 | 1.00(ref.)      |
|                                 | 1.14-1.68 | 113        | 144 | 1.15(0.81-1.62) | 232        | 25 | 1.05(0.55-1.88) | 238         | 17 | 0.82(0.42-1.60) | 189         | 66 | 0.89(0.61-1.32) | 212            | 43 | 1.52(0.92-2.50) |
|                                 | >1.68     | 117        | 146 | 1.12(0.80-1.58) | 234        | 29 | 1.21(0.69-2.12) | 231         | 5  | 0.25(0.09-0.67) | 169         | 67 | 1.01(0.69-1.50) | 195            | 41 | 1.57(0.95-2.60) |
|                                 | p,trend   |            |     | 0.54            |            |    | 0.51            |             |    | <b>0.003</b>    |             |    | 0.79            |                |    | <b>0.04</b>     |
| Vitamin B <sub>6</sub><br>mg/d  | <1.02     | 127        | 140 | 1.00(ref.)      | 243        | 24 | 1.00(ref.)      | 250         | 17 | 1.00(ref.)      | 199         | 68 | 1.00(ref.)      | 235            | 32 | 1.00(ref.)      |
|                                 | 1.02-1.49 | 124        | 138 | 1.01(0.72-1.42) | 238        | 24 | 1.02(0.56-1.85) | 232         | 20 | 0.93(0.56-1.46) | 190         | 62 | 0.96(0.64-1.42) | 204            | 48 | 1.73(1.06-2.81) |
|                                 | >1.49     | 106        | 153 | 1.31(0.93-1.85) | 228        | 31 | 1.38(0.78-2.42) | 229         | 6  | 0.39(0.15-0.99) | 158         | 77 | 1.43(0.97-2.10) | 200            | 35 | 1.29(0.77-2.15) |
|                                 | p,trend   |            |     | 0.11            |            |    | 0.24            |             |    | <b>0.05</b>     |             |    | 0.06            |                |    | 0.35            |
| Vitamin B <sub>12</sub><br>μg/d | <2.84     | 118        | 146 | 1.00(ref.)      | 238        | 26 | 1.00(ref.)      | 242         | 21 | 1.00(ref.)      | 194         | 69 | 1.00(ref.)      | 231            | 32 | 1.00(ref.)      |
|                                 | 2.84-4.8  | 121        | 140 | 0.94(0.66-1.32) | 239        | 22 | 0.84(0.47-1.53) | 224         | 17 | 0.88(0.45-1.70) | 178         | 63 | 1.00(0.67-1.48) | 196            | 45 | 1.66(1.01-2.71) |
|                                 | >4.8      | 118        | 145 | 0.99(0.71-1.40) | 232        | 31 | 1.22(0.71-2.12) | 245         | 5  | 0.24(0.09-0.63) | 175         | 75 | 1.21(0.82-1.78) | 212            | 38 | 1.29(0.78-2.15) |
|                                 | p,trend   |            |     | 0.99            |            |    | 0.40            |             |    | <b>0.002</b>    |             |    | 0.35            |                |    | 0.35            |
| Alcohol<br>g/d                  | never     | 176        | 150 | 1.00(ref.)      | 313        | 13 | 1.00(ref.)      | 294         | 15 | 1.00(ref.)      | 222         | 87 | 1.00(ref.)      | 269            | 40 | 1.00(ref.)      |
|                                 | 0-15      | 187        | 173 | 1.09(0.80-1.47) | 350        | 10 | 0.69(0.30-1.59) | 324         | 19 | 0.87(0.43-1.74) | 256         | 87 | 1.15(0.82-1.63) | 283            | 60 | 0.70(0.46-1.08) |
|                                 | >15       | 50         | 64  | 1.50(0.98-2.31) | 108        | 6  | 1.34(0.50-3.61) | 103         | 10 | 1.66(0.75-3.67) | 76          | 37 | 1.43(0.90-2.27) | 97             | 16 | 0.78(0.43-1.41) |
|                                 | p,trend   |            |     | 0.09            |            |    | 0.85            |             |    | 0.16            |             |    | 0.35            |                |    | 0.41            |

Supplementary Table 1. (countinue)

| Nutrients                       | range     | <i>CCND2</i> |    |                 | <i>GSTP1</i> |    |                 | <i>RASSF1A</i> |     |                 | <i>H1N1</i> |     |                 | <i>DAPK1</i> |    |                 |
|---------------------------------|-----------|--------------|----|-----------------|--------------|----|-----------------|----------------|-----|-----------------|-------------|-----|-----------------|--------------|----|-----------------|
|                                 |           | U            | M  | OR(95% CI)      | U            | M  | OR(95% CI)      | U              | M   | OR (95%)        | U           | M   | OR (95% CI)     | U            | M  | OR (95%)        |
| Dietary folate<br>µg/d          | <195      | 192          | 56 | 1.00(ref)       | 174          | 74 | 1.00(ref)       | 43             | 205 | 1.00(ref)       | 102         | 146 | 1.00(ref)       | 207          | 41 | 1.00(ref)       |
|                                 | 195-294   | 210          | 58 | 0.95(0.63-1.44) | 194          | 74 | 0.90(0.61-1.31) | 41             | 227 | 1.16(0.73-1.85) | 98          | 170 | 1.21(0.85-1.73) | 235          | 33 | 0.71(0.43-1.16) |
|                                 | >294      | 204          | 34 | 0.57(0.36-.91)  | 176          | 62 | 0.83(0.56-1.23) | 27             | 211 | 1.64(0.98-2.75) | 82          | 156 | 1.33(0.92-1.92) | 204          | 34 | 0.84(0.51-1.38) |
|                                 | p,trend   |              |    | <b>0.01</b>     |              |    | 0.25            |                |     | 0.07            |             |     | 0.13            |              |    | 0.49            |
| Methionine<br>g/d               | <0.63     | 203          | 48 | 1.00(ref)       | 180          | 71 | 1.00(ref)       | 34             | 217 | 1.00(ref)       | 97          | 154 | 1.00(ref)       | 210          | 41 | 1.00(ref)       |
|                                 | 0.63-0.93 | 201          | 54 | 1.14(0.74-1.76) | 184          | 71 | 0.98(0.66-1.44) | 40             | 215 | 0.84(0.51-1.38) | 95          | 160 | 1.06(0.74-1.52) | 219          | 36 | 0.84(0.52-1.37) |
|                                 | >0.93     | 202          | 46 | 0.96(0.62-1.51) | 180          | 68 | 0.96(0.65-1.42) | 37             | 211 | 0.89(0.54-1.48) | 90          | 158 | 1.11(0.77-1.59) | 217          | 31 | 0.73(0.44-1.21) |
|                                 | p,trend   |              |    | 0.88            |              |    | 0.87            |                |     | 0.86            |             |     | 0.69            |              |    | 0.16            |
| Choline<br>mg/d                 | <142      | 220          | 52 | 1.00(ref)       | 192          | 80 | 1.00(ref)       | 41             | 231 | 1.00(ref)       | 106         | 166 | 1.00(ref)       | 233          | 39 | 1.00(ref)       |
|                                 | 142-206   | 187          | 55 | 1.24(0.81-1.91) | 176          | 66 | 0.90(0.61-1.32) | 40             | 202 | 0.90(0.56-1.44) | 93          | 149 | 1.02(0.72-1.46) | 203          | 39 | 1.15(0.71-1.86) |
|                                 | >206      | 199          | 41 | 0.87(0.56-1.37) | 176          | 64 | 0.87(0.59-1.29) | 30             | 210 | 1.24(0.75-2.06) | 83          | 157 | 1.21(0.84-1.73) | 210          | 30 | 0.85(0.51-1.42) |
|                                 | p,trend   |              |    | 0.46            |              |    | 0.55            |                |     | 0.43            |             |     | 0.37            |              |    | 0.59            |
| Betaine<br>mg/d                 | <77       | 212          | 63 | 1.00(ref)       | 203          | 72 | 1.00(ref)       | 47             | 228 | 1.00(ref)       | 112         | 163 | 1.00(ref)       | 235          | 40 | 1.00(ref)       |
|                                 | 77-138.4  | 183          | 41 | 0.75(0.49-1.17) | 151          | 73 | 1.36(0.93-2.01) | 30             | 194 | 1.33(0.81-2.19) | 79          | 145 | 1.26(0.88-1.82) | 196          | 28 | 0.84(0.50-1.41) |
|                                 | >138.4    | 211          | 44 | 0.70(0.46-1.08) | 190          | 65 | 0.97(0.65-1.42) | 34             | 221 | 1.34(0.83-2.16) | 91          | 164 | 1.24(0.87-1.76) | 215          | 40 | 1.10(0.68-1.76) |
|                                 | p,trend   |              |    | 0.11            |              |    | 0.76            |                |     | 0.30            |             |     | 0.26            |              |    | 0.79            |
| Vitamin B <sub>2</sub><br>mg/d  | <1.14     | 206          | 57 | 1.00(ref)       | 182          | 81 | 1.00(ref)       | 46             | 217 | 1.00(ref)       | 111         | 152 | 1.00(ref)       | 217          | 46 | 1.00(ref)       |
|                                 | 1.14-1.68 | 201          | 54 | 0.97(0.64-1.48) | 193          | 62 | 0.72(0.49-1.06) | 41             | 214 | 1.11(0.70-1.76) | 96          | 159 | 1.21(0.85-1.72) | 224          | 31 | 0.65(0.40-1.07) |
|                                 | >1.68     | 199          | 37 | 0.67(0.43-1.06) | 169          | 67 | 0.89(0.61-1.31) | 24             | 212 | 1.87(1.10-3.18) | 75          | 161 | 1.57(1.09-2.26) | 205          | 31 | 0.71(0.44-1.17) |
|                                 | p,trend   |              |    | 0.09            |              |    | 0.54            |                |     | 0.06            |             |     | <b>0.02</b>     |              |    | 0.42            |
| Vitamin B <sub>6</sub><br>mg/d  | <1.02     | 205          | 62 | 1.00(ref)       | 190          | 77 | 1.00(ref)       | 46             | 221 | 1.00(ref)       | 107         | 160 | 1.00(ref)       | 222          | 45 | 1.00(ref)       |
|                                 | 1.02-1.49 | 202          | 50 | 0.82(0.54-1.25) | 180          | 72 | 0.99(0.68-1.44) | 35             | 217 | 1.29(0.80-2.08) | 101         | 151 | 1.00(0.70-1.42) | 213          | 39 | 0.90(0.57-1.44) |
|                                 | >1.49     | 199          | 36 | 0.60(0.38-.94)  | 174          | 61 | 0.87(0.58-1.28) | 30             | 205 | 1.42(0.87-2.34) | 74          | 161 | 1.46(1.01-2.10) | 211          | 24 | 0.56(0.33-0.95) |
|                                 | p,trend   |              |    | <b>0.05</b>     |              |    | 0.62            |                |     | 0.12            |             |     | <b>0.04</b>     |              |    | 0.07            |
| Vitamin B <sub>12</sub><br>µg/d | <2.84     | 209          | 54 | 1.00(ref)       | 189          | 74 | 1.00(ref)       | 45             | 218 | 1.00(ref)       | 105         | 158 | 1.00(ref)       | 219          | 44 | 1.00(ref)       |
|                                 | 2.84-4.8  | 189          | 52 | 1.07(0.69-1.64) | 173          | 68 | 1.00(.68-1.48)  | 36             | 205 | 1.18(0.73-1.90) | 93          | 148 | 1.06(0.74-1.51) | 208          | 33 | 0.79(0.48-1.29) |
|                                 | >4.8      | 208          | 42 | 0.78(0.50-1.22) | 182          | 68 | 0.95(0.65-1.41) | 30             | 220 | 1.51(0.92-2.50) | 84          | 166 | 1.31(0.92-1.88) | 219          | 31 | 0.70(0.43-1.16) |
|                                 | p,trend   |              |    | 0.35            |              |    | 0.84            |                |     | 0.07            |             |     | 0.10            |              |    | 0.21            |
| Alcohol<br>g/d                  | never     | 247          | 62 | 1.00(ref)       | 231          | 78 | 1.00(ref)       | 43             | 266 | 1.00(ref)       | 112         | 197 | 1.00(ref)       | 271          | 38 | 1.00(ref)       |
|                                 | 0-15      | 280          | 63 | 1.12(0.76-1.65) | 245          | 98 | 0.84(0.60-1.20) | 57             | 286 | 1.23(0.80-1.90) | 133         | 210 | 1.11(0.81-1.53) | 290          | 53 | 0.77(0.49-1.20) |
|                                 | >15       | 88           | 25 | 1.26(0.75-2.13) | 76           | 37 | 1.22(0.77-1.92) | 13             | 100 | 1.53(0.81-2.92) | 39          | 74  | 1.20(0.77-1.87) | 96           | 17 | 0.97(0.54-1.75) |
|                                 | p,trend   |              |    | 0.85            |              |    | 0.12            |                |     | 0.88            |             |     | 0.98            |              |    | 0.32            |

Supplementary Table 2.

| Genes                               | Genotype | ESR1 |     |                 | PGR |    |                 | BRCA1 |     |                 |
|-------------------------------------|----------|------|-----|-----------------|-----|----|-----------------|-------|-----|-----------------|
|                                     |          | U    | M   | OR(95% CI)      | U   | M  | OR(95% CI)      | U     | M   | OR(95% CI)      |
| <i>MTHFR</i><br><i>rs1801133</i>    | CC       | 126  | 89  | 1.00(ref.)      | 194 | 22 | 1.00(ref.)      | 95    | 121 | 1.00(ref.)      |
|                                     | CT       | 142  | 129 | 1.29(0.90-1.85) | 244 | 31 | 1.12(0.63-2.00) | 101   | 174 | 1.35(0.94-1.95) |
|                                     | TT       | 60   | 47  | 1.11(0.69-1.77) | 91  | 16 | 1.55(0.78-3.10) | 48    | 59  | 0.97(0.61-1.54) |
|                                     | p,trend  |      |     | 0.47            |     |    | 0.24            |       |     | 0.77            |
| <i>MTHFR</i><br><i>rs1801131</i>    | AA       | 162  | 145 | 1.00(ref.)      | 270 | 40 | 1.00(ref.)      | 124   | 186 | 1.00(ref.)      |
|                                     | AC       | 142  | 93  | 0.73(0.52-1.03) | 213 | 24 | 0.76(0.45-1.30) | 93    | 144 | 1.03(0.73-1.46) |
|                                     | CC       | 24   | 27  | 1.26(0.69-2.28) | 46  | 5  | 0.73(0.28-1.96) | 26    | 25  | 0.64(0.35-1.16) |
|                                     | p,trend  |      |     | 0.65            |     |    | 0.31            |       |     | 0.35            |
| <i>TYMS</i><br><i>Tandem</i>        | 3R/3R    | 109  | 67  | 1.00(ref.)      | 156 | 22 | 1.00(ref.)      | 77    | 101 | 1.00(ref.)      |
|                                     | 3R/2R    | 152  | 127 | 1.36(0.93-2.00) | 250 | 30 | 0.85(0.47-1.53) | 111   | 169 | 1.16(0.79-1.70) |
|                                     | 2R/2R    | 65   | 67  | 1.68(1.06-2.65) | 117 | 17 | 1.03(0.52-2.03) | 52    | 82  | 1.20(0.76-1.90) |
|                                     | p,trend  |      |     | <b>0.03</b>     |     |    | 0.98            |       |     | 0.41            |
| <i>DHFR</i><br><i>19bp deletion</i> | +/+      | 99   | 75  | 1.00(ref.)      | 159 | 18 | 1.00(ref.)      | 71    | 106 | 1.00(ref.)      |
|                                     | +/-      | 165  | 137 | 1.10(0.75-1.60) | 263 | 41 | 1.38(0.77-2.48) | 127   | 177 | 0.93(0.64-1.36) |
|                                     | -/-      | 63   | 53  | 1.11(0.69-1.78) | 107 | 10 | 0.83(0.37-1.86) | 47    | 70  | 1.00(0.62-1.61) |
|                                     | p,trend  |      |     | 0.64            |     |    | 0.84            |       |     | 0.94            |
| <i>MTR</i><br><i>rs1805087</i>      | AA       | 230  | 166 | 1.00(ref.)      | 359 | 40 | 1.00(ref.)      | 163   | 236 | 1.00(ref.)      |
|                                     | AG       | 85   | 86  | 1.40(0.98-2.01) | 150 | 24 | 1.44(0.84-2.47) | 71    | 103 | 1.00(0.70-1.44) |
|                                     | GG       | 11   | 10  | 1.26(0.52-3.04) | 18  | 3  | 1.50(0.42-5.30) | 10    | 11  | 0.76(0.32-1.83) |
|                                     | p,trend  |      |     | 0.10            |     |    | 0.19            |       |     | 0.73            |
| <i>MTRR</i><br><i>rs1801394</i>     | AA       | 75   | 69  | 1.00(ref.)      | 129 | 15 | 1.00(ref.)      | 58    | 86  | 1.00(ref.)      |
|                                     | AG       | 185  | 132 | 0.78(0.52-1.15) | 280 | 39 | 1.20(0.64-2.25) | 123   | 196 | 1.08(0.72-1.61) |
|                                     | GG       | 66   | 61  | 1.01(0.62-1.62) | 116 | 14 | 1.04(0.48-2.24) | 60    | 70  | 0.79(0.49-1.27) |
|                                     | p,trend  |      |     | 0.96            |     |    | 0.91            |       |     | 0.34            |
| <i>BHMT</i><br><i>rs3733890</i>     | GG       | 145  | 132 | 1.00(ref.)      | 251 | 29 | 1.00(ref.)      | 112   | 168 | 1.00(ref.)      |
|                                     | GA       | 145  | 104 | 0.79(0.56-1.11) | 218 | 34 | 1.35(0.80-2.29) | 102   | 150 | 0.98(0.69-1.39) |
|                                     | AA       | 36   | 27  | 0.82(0.47-1.43) | 57  | 6  | 0.91(0.36-2.30) | 29    | 34  | 0.78(0.45-1.36) |
|                                     | p,trend  |      |     | 0.24            |     |    | 0.68            |       |     | 0.48            |
| <i>RFC1</i><br><i>rs1051266</i>     | AA       | 92   | 72  | 1.00(ref.)      | 147 | 19 | 1.00(ref.)      | 65    | 101 | 1.00(ref.)      |
|                                     | AG       | 164  | 128 | 1.00(0.68-1.47) | 260 | 35 | 1.04(0.58-1.89) | 127   | 168 | 0.85(0.58-1.25) |
|                                     | GG       | 73   | 66  | 1.16(0.73-1.82) | 124 | 16 | 1.00(0.49-2.02) | 53    | 87  | 1.06(0.67-1.68) |
|                                     | p,trend  |      |     | 0.55            |     |    | 0.99            |       |     | 0.87            |
| <i>cSHMT</i><br><i>rs1979277</i>    | CC       | 167  | 119 | 1.00(ref.)      | 252 | 35 | 1.00(ref.)      | 114   | 173 | 1.00(ref.)      |
|                                     | CT       | 130  | 124 | 1.34(0.95-1.88) | 232 | 25 | 0.78(0.45-1.34) | 105   | 152 | 0.95(0.68-1.34) |
|                                     | TT       | 29   | 22  | 1.07(0.58-1.94) | 43  | 9  | 1.51(0.68-3.36) | 25    | 27  | 0.71(0.39-1.29) |
|                                     | p,trend  |      |     | 0.28            |     |    | 0.81            |       |     | 0.35            |

|                                  |         |     |     |                 |     |    |                  |     |     |                 |
|----------------------------------|---------|-----|-----|-----------------|-----|----|------------------|-----|-----|-----------------|
| <b>PEMT</b><br><i>rs7946</i>     | TT      | 136 | 121 | 1.00(ref.)      | 231 | 29 | 1.00(ref.)       | 97  | 163 | 1.00(ref.)      |
|                                  | TC      | 137 | 106 | 0.87(0.61-1.24) | 216 | 29 | 1.07(0.62-1.85)  | 111 | 134 | 0.72(0.50-1.03) |
|                                  | CC      | 47  | 30  | 0.72(0.43-1.21) | 68  | 9  | 1.05(0.48-2.34)  | 28  | 49  | 1.04(0.61-1.77) |
|                                  | p,trend |     |     | 0.19            |     |    | 0.84             |     |     | 0.53            |
| <b>PEMT</b><br><i>rs12325817</i> | GG      | 82  | 77  | 1.00(ref.)      | 142 | 19 | 1.00(ref.)       | 63  | 98  | 1.00(ref.)      |
|                                  | GC      | 173 | 118 | 0.73(0.49-1.07) | 259 | 35 | 1.01(0.56-1.83)  | 122 | 172 | 0.91(0.61-1.34) |
|                                  | CC      | 65  | 59  | 0.97(0.60-1.55) | 111 | 13 | 0.88(0.41-1.85)  | 53  | 71  | 0.86(0.54-1.39) |
|                                  | p,trend |     |     | 0.76            |     |    | 0.75             |     |     | 0.53            |
| <b>CHDH</b><br><i>rs12676</i>    | GG      | 159 | 125 | 1.00(ref.)      | 250 | 36 | 1.00(ref.)       | 126 | 160 | 1.00(ref.)      |
|                                  | GT      | 138 | 115 | 1.06(0.75-1.49) | 227 | 28 | 0.86(0.51-1.45)  | 95  | 160 | 1.33(0.94-1.87) |
|                                  | TT      | 27  | 21  | 0.99(0.53-1.83) | 45  | 4  | 0.62(0.21-1.82)  | 21  | 28  | 1.05(0.57-1.94) |
|                                  | p,trend |     |     | 0.87            |     |    | 0.34             |     |     | 0.31            |
| <b>CHDH</b><br><i>rs9001</i>     | AA      | 264 | 199 | 1.00(ref.)      | 416 | 51 | 1.00(ref.)       | 197 | 270 | 1.00(ref.)      |
|                                  | AC      | 52  | 55  | 1.40(0.92-2.14) | 94  | 14 | 1.22(0.65-2.29)  | 42  | 66  | 1.15(0.75-1.76) |
|                                  | CC      | 5   | 6   | 1.59(0.48-5.29) | 8   | 3  | 3.06(0.79-11.90) | 2   | 9   | 3.28(0.70-5.36) |
|                                  | p,trend |     |     | 0.09            |     |    | 0.17             |     |     | 0.17            |

Supplementary Table 2. (continue)

| Genes                               | Genotype | APC |     |                 | p16 |    |                 | CDH1 |    |                 | RARβ |    |                | TWIST1 |    |                 |
|-------------------------------------|----------|-----|-----|-----------------|-----|----|-----------------|------|----|-----------------|------|----|----------------|--------|----|-----------------|
|                                     |          | U   | M   | OR(95% CI)      | U   | M  | OR(95% CI)      | U    | M  | OR(95% CI)      | U    | M  | OR(95% CI)     | U      | M  | OR(95% CI)      |
| <i>MTHFR</i><br><i>rs1801133</i>    | CC       | 97  | 105 | 1.00(ref.)      | 188 | 14 | 1.00(ref.)      | 190  | 12 | 1.00(ref.)      | 152  | 50 | 1.00(ref.)     | 177    | 25 | 1.00(ref.)      |
|                                     | CT       | 106 | 152 | 1.33(0.91-1.92) | 224 | 34 | 2.04(1.06-3.91) | 234  | 13 | 0.88(0.39-1.97) | 178  | 69 | 1.18(.77-1.80) | 195    | 52 | 1.89(1.12-3.17) |
|                                     | TT       | 52  | 52  | 0.92(0.58-1.48) | 97  | 7  | 0.97(0.38-2.48) | 89   | 5  | 0.89(0.30-2.60) | 66   | 28 | 1.29(.75-2.23) | 81     | 13 | 1.14(0.55-2.33) |
|                                     | p,trend  |     |     | 0.94            |     |    | 0.61            |      |    | 0.77            |      |    | 0.33           |        |    | 0.34            |
| <i>MTHFR</i><br><i>rs1801131</i>    | AA       | 130 | 160 | 1.00(ref.)      | 262 | 28 | 1.00(ref.)      | 268  | 16 | 1.00(ref.)      | 204  | 80 | 1.00(ref.)     | 234    | 50 | 1.00(ref.)      |
|                                     | AC       | 102 | 125 | 1.00(0.70-1.41) | 204 | 23 | 1.06(0.59-1.89) | 203  | 12 | 0.99(.46-2.14)  | 160  | 55 | 0.88(.59-1.31) | 181    | 34 | 0.88(0.55-1.42) |
|                                     | CC       | 22  | 25  | 0.92(0.50-1.71) | 43  | 4  | 0.87(0.29-2.61) | 42   | 2  | 0.80(.18-3.60)  | 31   | 13 | 1.07(.53-2.15) | 38     | 6  | 0.74(0.30-1.84) |
|                                     | p,trend  |     |     | 0.85            |     |    | 0.95            |      |    | 0.83            |      |    | 0.81           |        |    | 0.45            |
| <i>TYMS</i><br><i>Tandem</i>        | 3R/3R    | 80  | 86  | 1.00(ref.)      | 158 | 9  | 1.00(ref.)      | 155  | 7  | 1.00(ref.)      | 115  | 47 | 1.00(ref.)     | 138    | 24 | 1.00(ref.)      |
|                                     | 3R/2R    | 110 | 150 | 1.28(0.87-1.90) | 226 | 34 | 2.64(1.23-5.66) | 234  | 17 | 1.61(.65-3.97)  | 185  | 66 | 0.87(.56-1.36) | 204    | 47 | 1.33(0.77-2.27) |
|                                     | 2R/2R    | 60  | 71  | 1.12(0.71-1.76) | 119 | 12 | 1.77(0.72-4.34) | 118  | 6  | 1.13(.37-3.44)  | 92   | 32 | 0.85(.50-1.44) | 105    | 19 | 1.04(0.54-2.00) |
|                                     | p,trend  |     |     | 0.58            |     |    | 0.2             |      |    | 0.77            |      |    | 0.53           |        |    | 0.83            |
| <i>DHFR</i><br><i>19bp deletion</i> | +/+      | 80  | 85  | 1.00(ref.)      | 141 | 24 | 1.00(ref.)      | 146  | 12 | 1.00(ref.)      | 112  | 46 | 1.00(ref.)     | 133    | 25 | 1.00(ref.)      |
|                                     | +/-      | 127 | 158 | 1.17(0.80-1.72) | 264 | 21 | 0.47(0.25-0.87) | 262  | 16 | 0.74(.34-1.61)  | 200  | 78 | 0.95(.62-1.46) | 233    | 45 | 1.03(0.60-1.75) |
|                                     | -/-      | 48  | 66  | 1.29(0.80-2.09) | 103 | 11 | 0.63(0.29-1.34) | 105  | 2  | 0.23(.05-1.06)  | 84   | 23 | 0.67(.38-1.19) | 88     | 19 | 1.15(0.60-2.21) |
|                                     | p,trend  |     |     | 0.28            |     |    | 0.11            |      |    | <b>0.05</b>     |      |    | 0.2            |        |    | 0.69            |
| <i>MTR</i><br><i>rs1805087</i>      | AA       | 178 | 200 | 1.00(ref.)      | 340 | 38 | 1.00(ref.)      | 348  | 16 | 1.00(ref.)      | 274  | 90 | 1.00(ref.)     | 302    | 62 | 1.00(ref.)      |
|                                     | AG       | 63  | 100 | 1.41(0.97-2.05) | 149 | 14 | 0.84(0.44-1.60) | 145  | 12 | 1.80(.83-3.90)  | 106  | 51 | 1.47(.97-2.21) | 132    | 25 | 0.92(0.56-1.53) |
|                                     | GG       | 9   | 10  | 0.99(0.39-2.49) | 15  | 4  | 2.39(0.75-7.56) | 17   | 1  | 1.28(.16-10.22) | 13   | 5  | 1.17(.41-3.38) | 16     | 2  | 0.61(0.14-2.72) |
|                                     | p,trend  |     |     | 0.18            |     |    | 0.62            |      |    | 0.21            |      |    | 0.12           |        |    | 0.54            |
| <i>MTRR</i><br><i>rs1801394</i>     | AA       | 56  | 82  | 1.00(ref.)      | 121 | 17 | 1.00(ref.)      | 117  | 9  | 1.00(ref.)      | 95   | 31 | 1.00(ref.)     | 99     | 27 | 1.00(ref.)      |
|                                     | AG       | 133 | 169 | 0.87(0.58-1.31) | 276 | 26 | 0.67(0.35-1.28) | 281  | 14 | 0.65(.27-1.54)  | 215  | 80 | 1.14(.71-1.84) | 254    | 41 | 0.59(0.35-1.01) |
|                                     | GG       | 62  | 58  | 0.64(0.39-1.05) | 108 | 12 | 0.79(0.36-1.73) | 111  | 7  | 0.82(.30-2.28)  | 82   | 36 | 1.35(.77-2.36) | 96     | 22 | 0.84(0.45-1.58) |
|                                     | p,trend  |     |     | 0.08            |     |    | 0.5             |      |    | 0.66            |      |    | 0.3            |        |    | 0.53            |
| <i>BHMT</i><br><i>rs3733890</i>     | GG       | 117 | 148 | 1.00(ref.)      | 243 | 22 | 1.00(ref.)      | 237  | 12 | 1.00(ref.)      | 183  | 66 | 1.00(ref.)     | 203    | 46 | 1.00(ref.)      |
|                                     | GA       | 106 | 131 | 0.98(0.69-1.39) | 210 | 27 | 1.42(0.79-2.57) | 218  | 14 | 1.27(.57-2.80)  | 170  | 62 | 1.01(.68-1.52) | 202    | 30 | 0.66(0.40-1.08) |
|                                     | AA       | 30  | 29  | 0.76(0.43-1.35) | 54  | 5  | 1.02(0.37-2.82) | 56   | 3  | 1.06(.29-3.88)  | 42   | 17 | 1.12(.60-2.11) | 46     | 13 | 1.25(0.62-2.50) |
|                                     | p,trend  |     |     | 0.45            |     |    | 0.54            |      |    | 0.73            |      |    | 0.77           |        |    | 0.77            |
| <i>RFC1</i><br><i>rs1051266</i>     | AA       | 64  | 96  | 1.00(ref.)      | 142 | 18 | 1.00(ref.)      | 139  | 13 | 1.00(ref.)      | 108  | 44 | 1.00(ref.)     | 130    | 22 | 1.00(ref.)      |
|                                     | AG       | 129 | 147 | 0.76(0.51-1.13) | 249 | 27 | 0.86(0.46-1.61) | 258  | 12 | 0.50(.22-1.12)  | 201  | 69 | 0.84(.54-1.31) | 231    | 39 | 1.00(0.57-1.76) |
|                                     | GG       | 63  | 68  | 0.72(0.45-1.15) | 120 | 11 | 0.72(0.33-1.59) | 119  | 5  | 0.45(.16-1.30)  | 90   | 34 | 0.93(.55-1.57) | 95     | 29 | 1.80(0.98-3.33) |
|                                     | p,trend  |     |     | 0.15            |     |    | 0.42            |      |    | 0.09            |      |    | 0.74           |        |    | 0.06            |
| <i>cSHMT</i><br><i>rs1979277</i>    | CC       | 122 | 149 | 1.00(ref.)      | 244 | 27 | 1.00(ref.)      | 248  | 12 | 1.00(ref.)      | 190  | 70 | 1.00(ref.)     | 222    | 38 | 1.00(ref.)      |
|                                     | CT       | 115 | 127 | 0.90(0.64-1.28) | 221 | 21 | 0.86(0.47-1.56) | 223  | 14 | 1.30(.59-2.86)  | 172  | 65 | 1.03(.69-1.52) | 190    | 47 | 1.45(0.90-2.31) |
|                                     | TT       | 17  | 32  | 1.54(0.82-2.91) | 43  | 6  | 1.26(0.49-3.24) | 40   | 4  | 2.07(.64-6.73)  | 32   | 12 | 1.02(.50-2.09) | 39     | 5  | 0.75(0.28-2.02) |
|                                     | p,trend  |     |     | 0.54            |     |    | 0.94            |      |    | 0.24            |      |    | 0.92           |        |    | 0.59            |

|                   |         |     |     |                 |     |    |                  |     |    |                |     |     |                |     |    |                 |
|-------------------|---------|-----|-----|-----------------|-----|----|------------------|-----|----|----------------|-----|-----|----------------|-----|----|-----------------|
| <b>PEMT</b>       | TT      | 126 | 122 | 1.00(ref.)      | 240 | 8  | 1.00(ref.)       | 224 | 12 | 1.00(ref)      | 180 | 56  | 1.00(ref)      | 191 | 45 | 1.00(ref)       |
| <b>rs7946</b>     | TC      | 121 | 110 | 0.94(0.66-1.34) | 223 | 8  | 1.08(0.40-2.92)  | 210 | 11 | .98(.42-2.26)  | 154 | 67  | 1.40(.92-2.12) | 188 | 33 | 0.75(0.46-1.22) |
|                   | CC      | 42  | 31  | 0.76(0.45-1.29) | 69  | 4  | 1.74(0.51-5.95)  | 66  | 6  | 1.70(.61-4.70) | 51  | 21  | 1.32(.73-2.39) | 64  | 8  | 0.53(0.24-1.19) |
|                   | p,trend |     |     | 0.35            |     |    | 0.44             |     |    | 0.41           |     |     | 0.18           |     |    | 0.08            |
| <b>PEMT</b>       | GG      | 74  | 77  | 1.00(ref.)      | 145 | 6  | 1.00(ref.)       | 145 | 6  | 1.00(ref)      | 107 | 44  | 1.00(ref)      | 133 | 18 | 1.00(ref)       |
| <b>rs12325817</b> | GC      | 151 | 128 | 0.82(0.55-1.21) | 267 | 12 | 1.09(0.40-2.95)  | 249 | 15 | 1.46(.55-3.83) | 190 | 74  | 0.95(.61-1.47) | 214 | 50 | 1.73(0.97-3.09) |
|                   | CC      | 62  | 54  | 0.84(0.52-1.36) | 114 | 2  | 0.42(0.08-1.14)  | 108 | 6  | 1.34(.42-4.28) | 90  | 24  | 0.65(.37-1.15) | 94  | 20 | 1.57(0.79-3.13) |
|                   | p,trend |     |     | 0.43            |     |    | 0.38             |     |    | 0.6            |     |     | 0.16           |     |    | 0.18            |
| <b>CHDH</b>       | GG      | 142 | 126 | 1.00(ref.)      | 262 | 6  | 1.00(ref.)       | 243 | 16 | 1.00(ref)      | 188 | 71  | 1.00(ref)      | 220 | 39 | 1.00(ref)       |
| <b>rs12676</b>    | GT      | 124 | 117 | 1.06(0.75-1.51) | 230 | 11 | 2.09(0.76-5.74)  | 216 | 14 | 0.98(.46-2.06) | 171 | 59  | 0.91(.61-1.37) | 192 | 38 | 1.12(0.69-1.82) |
|                   | TT      | 25  | 26  | 0.99(0.53-1.85) | 44  | 3  | 2.98(0.72-12.35) | 46  | 0  | N/A            | 32  | 14  | 1.16(.58-2.30) | 35  | 11 | 1.77(0.83-3.78) |
|                   | p,trend |     |     | 0.86            |     |    | 0.08             |     |    | N/A            |     |     | 0.96           |     |    | 0.2             |
| <b>CHDH</b>       | AA      | 233 | 206 | 1.00(ref.)      | 421 | 18 | 1.00(ref.)       | 400 | 22 | 1.00(ref)      | 309 | 113 | 1.00(ref)      | 347 | 75 | 1.00(ref)       |
| <b>rs9001</b>     | AC      | 57  | 48  | 1.09(0.73-1.65) | 104 | 1  | 0.23(0.03-1.74)  | 93  | 7  | 1.37(.57-3.30) | 75  | 25  | 0.91(.55-1.51) | 89  | 11 | 0.57(0.29-1.12) |
|                   | CC      | 2   | 9   |                 | 10  | 1  | 2.34(0.28-19.27) | 10  | 0  | N/A            | 6   | 4   | 1.82(.51-6.58) | 8   | 2  | 1.16(0.24-5.56) |
|                   | p,trend |     |     | 0.29            |     |    | 0.44             |     |    | N/A            |     |     | 0.84           |     |    | 0.22            |

Supplementary Table 2. (continue)

| Genes                               | Genotype | <i>CCND2</i> |    |                 | <i>GSTP1</i> |     |                 | <i>RASSF1A</i> |     |                 | <i>H1N1</i> |     |                 | <i>DAPK</i> |    |                 |
|-------------------------------------|----------|--------------|----|-----------------|--------------|-----|-----------------|----------------|-----|-----------------|-------------|-----|-----------------|-------------|----|-----------------|
|                                     |          | U            | M  | OR(95% CI)      | U            | M   | OR(95% CI)      | U              | M   | OR(95% CI)      | U           | M   | OR(95% CI)      | U           | M  | OR(95% CI)      |
| <i>MTHFR</i><br><i>rs1801133</i>    | CC       | 157          | 45 | 1.00(ref)       | 148          | 54  | 1.00(ref)       | 25             | 177 | 1.00(ref)       | 71          | 131 | 1.00(ref)       | 177         | 25 | 1.00(ref)       |
|                                     | CT       | 199          | 48 | 0.84(0.53-1.33) | 173          | 74  | 1.17(0.78-1.77) | 42             | 205 | 0.69(0.40-1.18) | 94          | 153 | 0.88(0.60-1.30) | 210         | 37 | 1.25(0.72-2.15) |
|                                     | TT       | 81           | 13 | 0.56(0.29-1.10) | 70           | 24  | 0.94(0.54-1.64) | 12             | 82  | 0.97(0.46-2.02) | 35          | 59  | 0.91(0.55-1.52) | 76          | 18 | 1.68(0.86-3.23) |
|                                     | p,trend  |              |    | 0.1             |              |     | 0.98            |                |     | 0.64            |             |     | 0.63            |             |    | 0.13            |
| <i>MTHFR</i><br><i>rs1801131</i>    | AA       | 233          | 51 | 1.00(ref)       | 199          | 85  | 1.00(ref)       | 44             | 240 | 1.00(ref)       | 107         | 177 | 1.00(ref)       | 235         | 49 | 1.00(ref)       |
|                                     | AC       | 168          | 47 | 1.28(0.82-2.00) | 160          | 55  | 0.81(0.54-1.20) | 31             | 184 | 1.09(0.66-1.79) | 86          | 129 | 0.91(0.63-1.30) | 190         | 25 | 0.63(0.38-1.06) |
|                                     | CC       | 36           | 8  | 1.02(0.45-2.31) | 32           | 12  | 0.88(0.43-1.79) | 5              | 39  | 1.43(0.53-3.83) | 8           | 36  | 2.72(1.22-6.07) | 38          | 6  | 0.76(0.30-1.89) |
|                                     | p,trend  |              |    | 0.51            |              |     | 0.38            |                |     | 0.49            |             |     | 0.16            |             |    | 0.15            |
| <i>TYMS</i><br><i>Tandem</i>        | 3R/3R    | 138          | 24 | 1.00(ref)       | 117          | 45  | 1.00(ref)       | 20             | 142 | 1.00(ref)       | 63          | 99  | 1.00(ref)       | 140         | 22 | 1.00(ref)       |
|                                     | 3R/2R    | 198          | 53 | 1.54(0.91-2.61) | 184          | 67  | 0.95(0.61-1.48) | 43             | 208 | 0.68(0.39-1.21) | 93          | 158 | 1.08(0.72-1.62) | 216         | 35 | 1.03(0.58-1.83) |
|                                     | 2R/2R    | 96           | 28 | 1.68(0.92-3.07) | 87           | 37  | 1.11(0.66-1.85) | 16             | 108 | 0.95(0.47-1.92) | 42          | 82  | 1.24(0.76-2.02) | 102         | 22 | 1.37(0.72-2.61) |
|                                     | p,trend  |              |    | 0.09            |              |     | 0.74            |                |     | 0.79            |             |     | 0.39            |             |    | 0.35            |
| <i>DHFR</i><br><i>19bp deletion</i> | +/+      | 124          | 34 | 1.00(ref)       | 107          | 51  | 1.00(ref)       | 25             | 133 | 1.00(ref)       | 65          | 93  | 1.00(ref)       | 140         | 18 | 1.00(ref)       |
|                                     | +/-      | 226          | 52 | 0.84(0.52-1.36) | 208          | 70  | 0.71(0.46-1.09) | 41             | 237 | 1.09(0.63-1.87) | 97          | 181 | 1.30(0.87-1.95) | 235         | 43 | 1.42(0.79-2.56) |
|                                     | -/-      | 88           | 19 | 0.79(0.42-1.47) | 76           | 31  | 0.86(0.50-1.46) | 13             | 94  | 1.36(0.66-2.79) | 38          | 69  | 1.27(0.76-2.11) | 88          | 19 | 1.68(0.84-3.37) |
|                                     | p,trend  |              |    | 0.42            |              |     | 0.43            |                |     | 0.42            |             |     | 0.29            |             |    | 0.14            |
| <i>MTR</i><br><i>rs1805087</i>      | AA       | 292          | 72 | 1.00(ref)       | 263          | 101 | 1.00(ref)       | 46             | 318 | 1.00(ref)       | 132         | 232 | 1.00(ref)       | 308         | 56 | 1.00(ref)       |
|                                     | AG       | 128          | 29 | 0.92(0.57-1.48) | 108          | 49  | 1.18(0.79-1.78) | 31             | 126 | 0.59(0.36-0.97) | 57          | 100 | 1.00(0.68-1.47) | 134         | 23 | 0.94(0.56-1.60) |
|                                     | GG       | 14           | 4  | 1.16(0.37-3.63) | 15           | 3   | 0.52(0.15-1.84) | 2              | 16  | 1.16(0.26-5.20) | 8           | 10  | 0.71(0.27-1.85) | 17          | 1  | 0.32(0.04-2.48) |
|                                     | p,trend  |              |    | 0.91            |              |     | 0.97            |                |     | 0.13            |             |     | 0.69            |             |    | 0.42            |
| <i>MTRR</i><br><i>rs1801394</i>     | AA       | 104          | 22 | 1.00(ref)       | 92           | 34  | 1.00(ref)       | 14             | 112 | 1.00(ref)       | 49          |     | 1.00(ref)       | 110         | 16 | 1.00(ref)       |
|                                     | AG       | 235          | 60 | 1.21(0.70-2.07) | 207          | 88  | 1.15(0.72-1.83) | 42             | 253 | 0.75(0.40-1.43) | 103         | 192 | 1.19(0.77-1.83) | 253         | 42 | 1.14(0.62-2.12) |
|                                     | GG       | 96           | 22 | 1.08(0.56-2.08) | 88           | 30  | 0.92(0.52-1.63) | 23             | 95  | 0.52(0.25-1.06) | 47          | 71  | 0.96(0.58-1.61) | 97          | 21 | 1.49(0.74-3.01) |
|                                     | p,trend  |              |    | 0.8             |              |     | 0.8             |                |     | 0.07            |             |     | 0.9             |             |    | 0.26            |
| <i>BHMT</i><br><i>rs3733890</i>     | GG       | 198          | 51 | 1.00(ref)       | 174          | 75  | 1.00(ref)       | 31             | 218 | 1.00(ref)       | 90          | 159 | 1.00(ref)       | 205         | 44 | 1.00(ref)       |
|                                     | GA       | 186          | 46 | 0.96(0.62-1.50) | 176          | 56  | 0.74(0.49-1.11) | 42             | 190 | 0.64(0.39-1.06) | 85          | 147 | 0.98(0.68-1.42) | 204         | 28 | 0.64(0.38-1.07) |
|                                     | AA       | 51           | 8  | 0.61(0.27-1.36) | 37           | 22  | 1.38(0.76-2.50) | 6              | 53  | 1.26(0.50-3.2)  | 24          | 35  | 0.83(0.46-1.48) | 51          | 8  | 0.73(0.32-1.65) |
|                                     | p,trend  |              |    | 0.33            |              |     | 0.91            |                |     | 0.61            |             |     | 0.59            |             |    | 0.16            |
| <i>RFC1</i><br><i>rs1051266</i>     | AA       | 118          | 34 | 1.00(ref)       | 104          | 48  | 1.00(ref)       | 18             | 134 | 1.00(ref)       | 60          | 92  | 1.00(ref)       | 134         | 18 | 1.00(ref)       |
|                                     | AG       | 219          | 51 | 0.81(0.50-1.32) | 201          | 68  | 0.74(0.48-1.15) | 47             | 223 | 0.64(0.36-1.14) | 101         | 169 | 1.09(0.73-1.64) | 229         | 41 | 1.33(0.74-2.41) |
|                                     | GG       | 103          | 21 | 0.71(0.39-1.30) | 88           | 36  | 0.89(0.53-1.49) | 15             | 109 | 0.98(0.47-2.03) | 40          | 84  | 1.37(0.83-2.25) | 103         | 21 | 1.52(0.77-3.00) |
|                                     | p,trend  |              |    | 0.25            |              |     | 0.58            |                |     | 0.85            |             |     | 0.23            |             |    | 0.23            |
| <i>cSHMT</i><br><i>rs1979277</i>    | CC       | 211          | 49 | 1.00(ref)       | 191          | 69  | 1.00(ref)       | 38             | 222 | 1.00(ref)       | 94          | 166 | 1.00(ref)       | 223         | 37 | 1.00(ref)       |
|                                     | CT       | 191          | 46 | 1.04(0.66-1.62) | 167          | 70  | 1.16(0.78-1.72) | 33             | 204 | 1.06(0.64-1.75) | 91          | 146 | 0.91(0.63-1.31) | 201         | 36 | 1.08(0.66-1.77) |
|                                     | TT       | 34           | 10 | 1.27(0.59-2.74) | 31           | 13  | 1.16(0.57-2.35) | 8              | 36  | 0.77(0.33-1.78) | 14          | 30  | 1.21(0.61-2.40) | 37          | 7  | 1.14(0.47-2.75) |
|                                     | p,trend  |              |    | 0.62            |              |     | 0.48            |                |     | 0.77            |             |     | 0.94            |             |    | 0.71            |



|                          |         |     |    |                 |     |     |                 |    |     |                 |     |     |                 |     |    |                 |
|--------------------------|---------|-----|----|-----------------|-----|-----|-----------------|----|-----|-----------------|-----|-----|-----------------|-----|----|-----------------|
| <b><i>PEMT</i></b>       | TT      | 185 | 51 | 1.00(ref)       | 162 | 74  | 1.00(ref)       | 33 | 203 | 1.00(ref)       | 93  | 143 | 1.00(ref)       | 202 | 34 | 1.00(ref)       |
| <b><i>rs7946</i></b>     | TC      | 187 | 34 | 0.66(0.41-1.07) | 167 | 54  | 0.71(0.47-1.07) | 34 | 187 | 0.89(0.53-1.50) | 80  | 141 | 1.15(0.79-1.67) | 190 | 31 | 0.97(0.57-1.64) |
|                          | CC      | 57  | 15 | 0.96(0.50-1.82) | 52  | 20  | 0.84(0.47-1.51) | 11 | 61  | 0.90(0.43-1.89) | 23  | 49  | 1.39(0.79-2.43) | 61  | 11 | 1.07(0.51-2.24) |
|                          | p,trend |     |    | 0.43            |     |     | 0.26            |    |     | 0.7             |     |     | 0.23            |     |    | 0.92            |
| <b><i>PEMT</i></b>       | GG      | 120 | 31 | 1.00(ref)       | 112 | 39  | 1.00(ref)       | 18 | 133 | 1.00(ref)       | 53  | 98  | 1.00(ref)       | 134 | 17 | 1.00(ref)       |
| <b><i>rs12325817</i></b> | GC      | 219 | 45 | 0.80(0.48-1.32) | 182 | 82  | 1.29(0.83-2.03) | 40 | 224 | 0.76(0.42-1.38) | 100 | 164 | 0.89(0.59-1.35) | 218 | 46 | 1.66(0.92-3.02) |
|                          | CC      | 89  | 25 | 1.09(0.60-1.97) | 87  | 27  | 0.89(0.51-1.57) | 18 | 96  | 0.72(0.36-1.46) | 43  | 71  | 0.89(0.54-1.48) | 98  | 16 | 1.29(0.62-2.67) |
|                          | p,trend |     |    | 0.87            |     |     | 0.82            |    |     | 0.35            |     |     | 0.64            |     |    | 0.43            |
| <b><i>CHDH</i></b>       | GG      | 202 | 57 | 1.00(ref)       | 196 | 63  | 1.00(ref)       | 44 | 215 | 1.00(ref)       | 105 | 154 | 1.00(ref)       | 218 | 41 | 1.00(ref)       |
| <b><i>rs12676</i></b>    | GT      | 191 | 39 | 0.72(0.46-1.14) | 160 | 70  | 1.36(0.91-2.03) | 32 | 198 | 1.27(0.77-2.08) | 78  | 152 | 1.33(0.92-1.92) | 199 | 31 | 0.83(0.50-1.37) |
|                          | TT      | 37  | 9  | 0.86(0.39-1.89) | 29  | 17  | 1.82(0.94-3.54) | 4  | 42  | 2.15(0.73-6.30) | 16  | 30  | 1.28(0.66-2.46) | 39  | 7  | 0.95(0.40-2.28) |
|                          | p,trend |     |    | 0.29            |     |     | <b>0.04</b>     |    |     | 0.13            |     |     | 0.17            |     |    | 0.63            |
| <b><i>CHDH</i></b>       | AA      | 342 | 80 | 1.00(ref)       | 293 | 129 | 1.00(ref)       | 66 | 356 | 1.00(ref)       | 151 | 271 | 1.00(ref)       | 355 | 67 | 1.00(ref)       |
| <b><i>rs9001</i></b>     | AC      | 78  | 22 | 1.21(0.71-2.05) | 82  | 18  | 0.50(0.39-.87)  | 14 | 86  | 1.14(0.61-2.12) | 43  | 57  | 0.74(0.47-1.15) | 91  | 9  | 0.53(.25-1.09)  |
|                          | CC      | 9   | 1  | 0.48(0.06-3.80) | 8   | 2   | 0.57(0.12-2.71) | 0  | 10  | N/A             | 3   | 7   | 1.30(0.33-5.10) | 9   | 1  | 0.59(.07-4.72)  |
|                          | p,trend |     |    | 0.86            |     |     | <b>0.02</b>     |    |     | 0.29            |     |     | 0.37            |     |    | 0.09            |
